# Supplementary material
Source: PubMed Central journal article supplement (PMC3242659)
Supplement: mt2011179x1.pdf [file mt2011179x1.pdf]

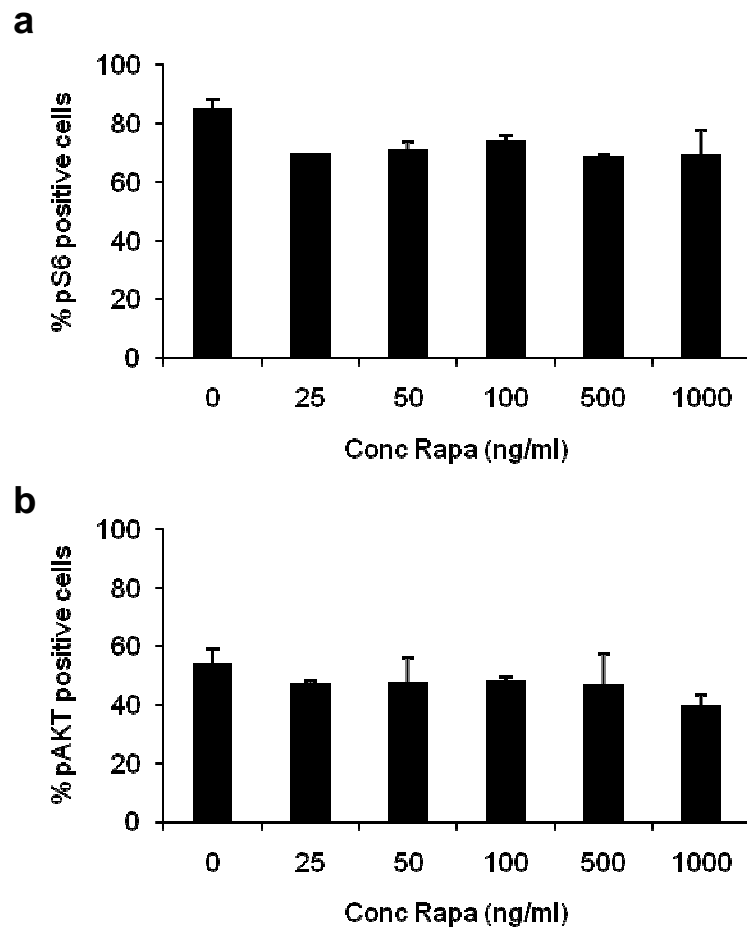

**Figure S1. mTorRR-expressing T cells maintain mTor signaling in the presence of high concentrations of rapa.** mTorRR-expressing cells were cultured in IL-15 in the presence of the indicated concentrations of rapa overnight and then stained for intracellular (a) phospho-S6 protein or (b) phospho-Akt<sup>Ser473</sup>. Graphs represent the mean  $\pm$  sd for 2 donors (gated on GFP+ cells).
