# Supplementary material
Source: PubMed Central journal article supplement (PMC3242659)
Supplement: mt2011179x2.pdf [file mt2011179x2.pdf]

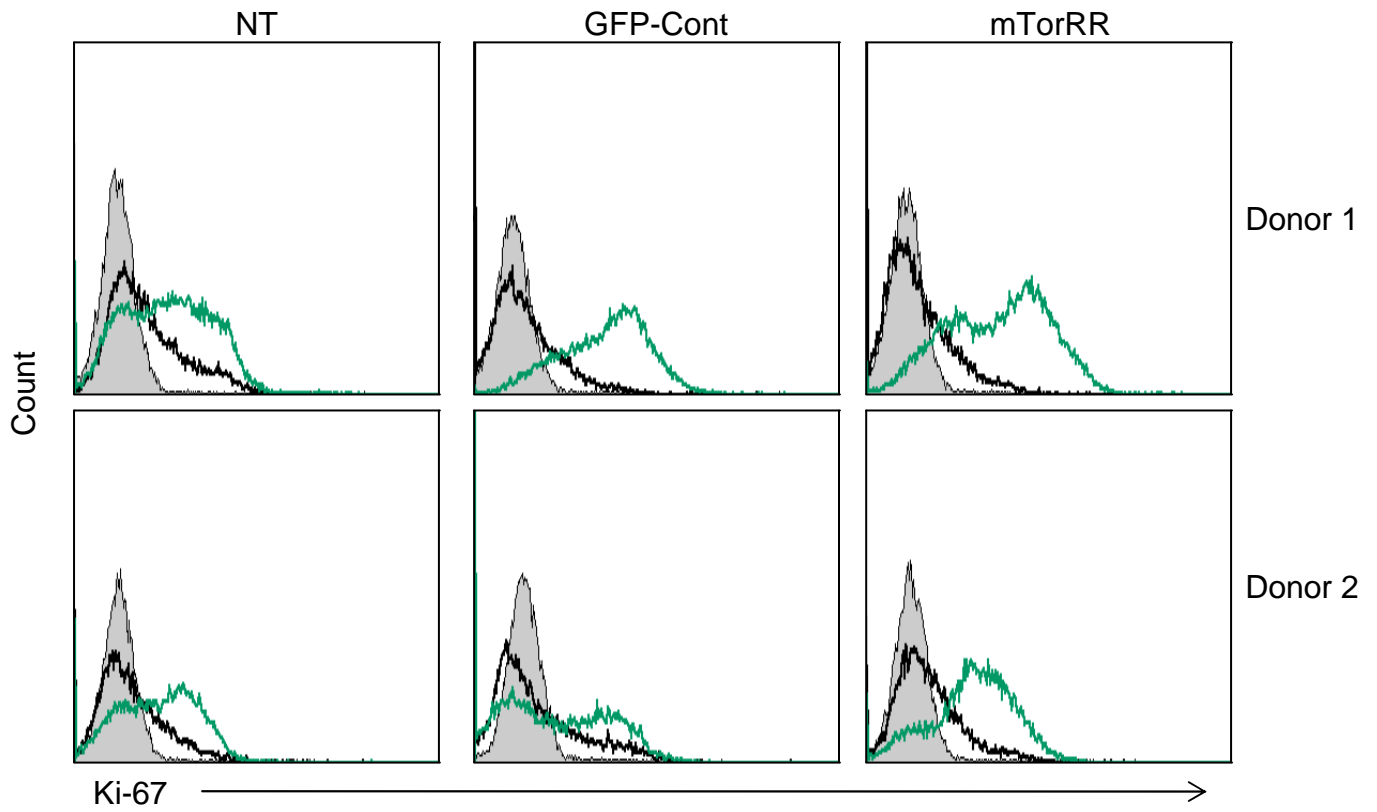

**Figure S2. mTorRR-expressing T cells return to the resting state in the absence of cytokine and serum.** Non-transfected (NT), GFP-control, and mTorRR-expressing cells were stained for Ki-67 after culturing in IL-2 for 48 hours (green histogram) or after 96 hours plus 24 hrs in serum free media (black histogram). Filled histogram is the isotype control.
